# Supplementary material for: Discovery of coordinately regulated pathways that provide innate protection against interbacterial antagonism
Source: eLife journal article supplement (doi:10.7554/elife.74658), 2022-02-17

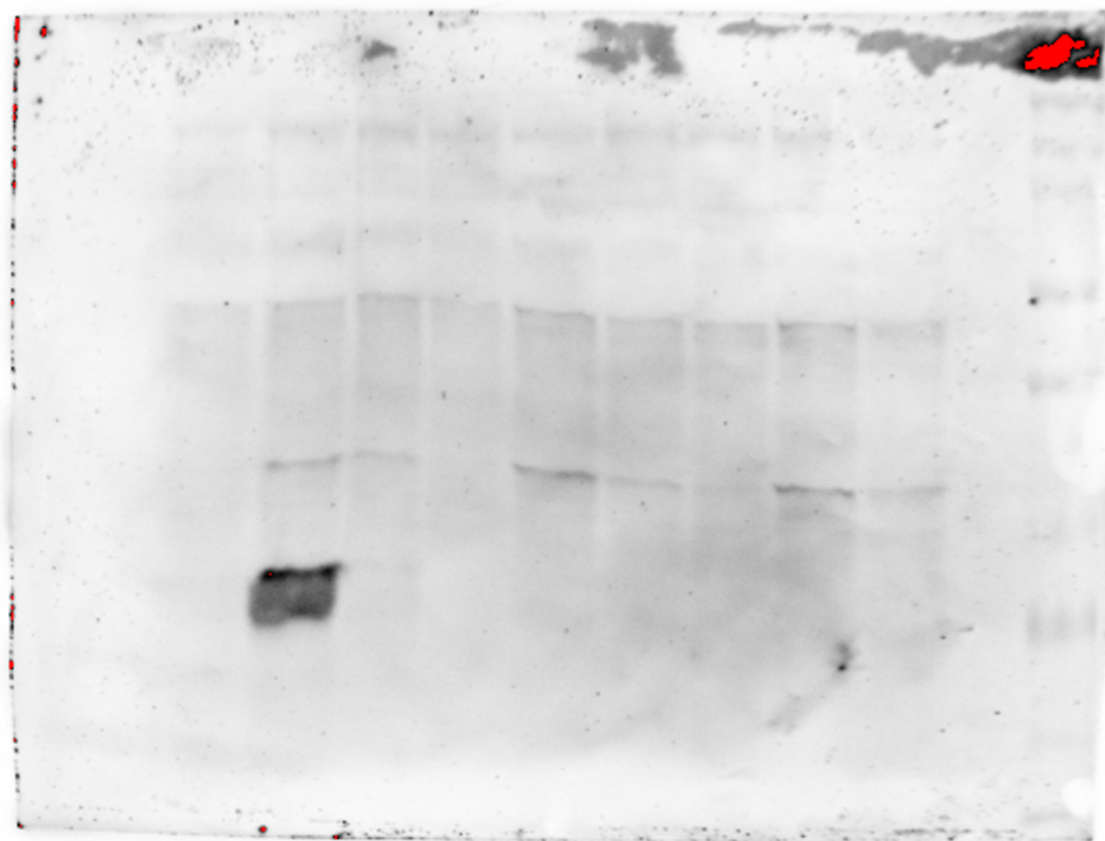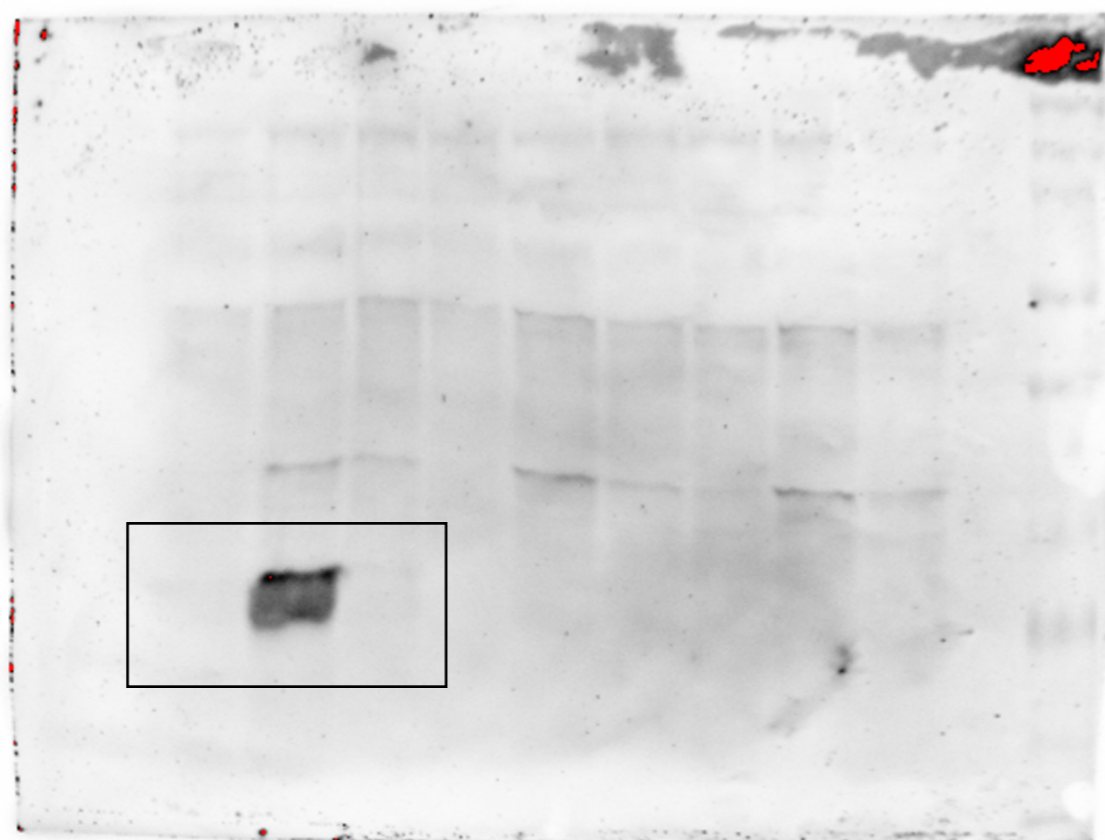

Supplement: supp [file elife-74658-supp-v1.zip]
